# Supplementary material
Source: MDPI journal article supplement (https://www.mdpi.com/2073-4441/15/3/585)

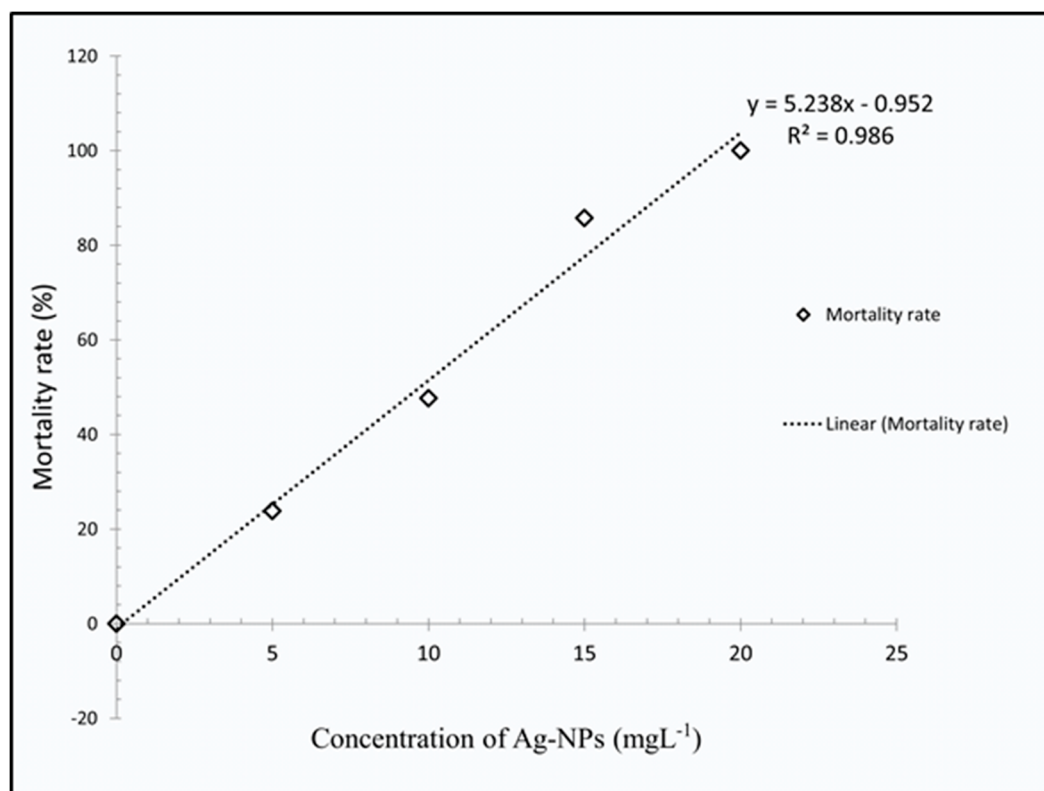

**Figure S1.** correlation between mortality rate of *C. capoeta* and silver nanoparticles (Ag-NPs).

Supplement: s1 [file s1 › water-2106993-supplementary.pdf]
